# Supplementary material for: Three-Dimensional Hierarchical Porous Nanotubes Derived from Metal-Organic Frameworks for Highly Efficient Overall Water Splitting
Source: PubMed Central journal article supplement — iScience. 2019 Dec 10;23(1):100761. doi: 10.1016/j.isci.2019.100761 (PMC6941879; doi:10.1016/j.isci.2019.100761), 2019-12-10
Supplement: mmc1.pdf [file mmc1.pdf]

ISCI, Volume 23

## **Supplemental Information**

### **Three-Dimensional Hierarchical Porous Nanotubes**

#### **Derived from Metal-Organic Frameworks**

#### **for Highly Efficient Overall Water Splitting**

**Yang Wang, Shenlong Zhao, Yinlong Zhu, Ruosang Qiu, Thomas Gengenbach, Yue Liu, Lianhai Zu, Haiyan Mao, Huanting Wang, Jing Tang, Dongyuan Zhao, and Cordelia Selomulya**

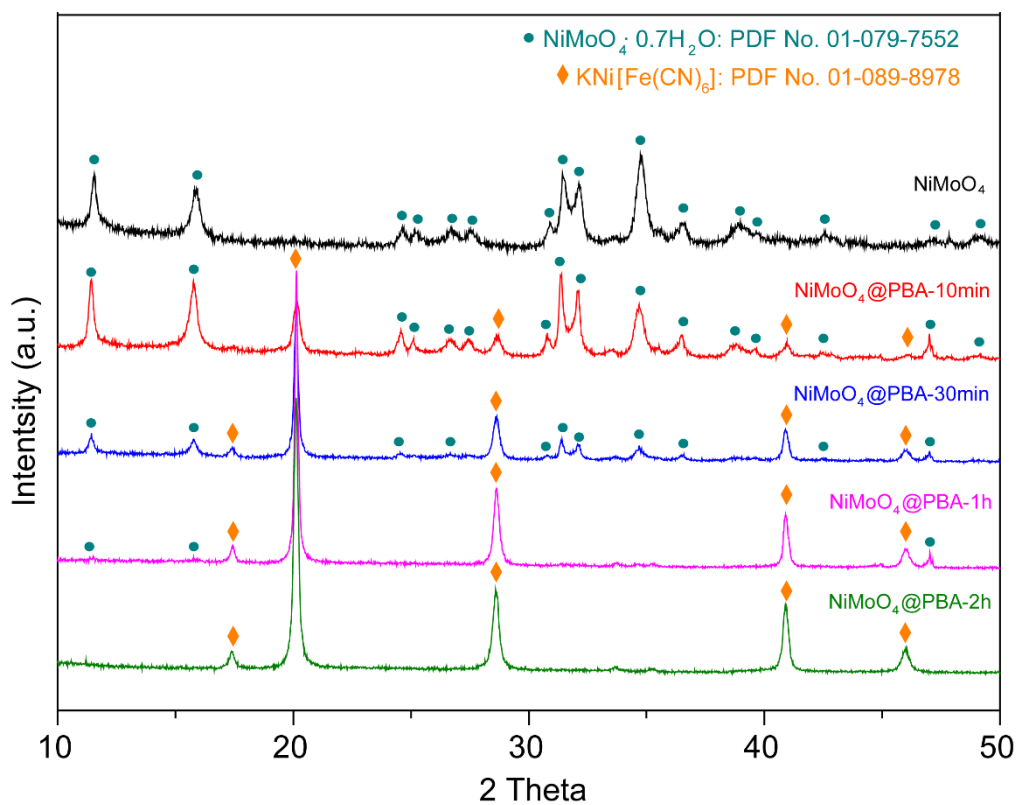

**Figure S1.** XRD patterns of  $\text{NiMoO}_4$ ,  $\text{NiMoO}_4@PBA-10\text{ min}$ ,  $\text{NiMoO}_4@PBA-30\text{ min}$ ,  $\text{NiMoO}_4@PBA-1\text{ h}$  and  $\text{NiMoO}_4@PBA-2\text{ h}$ , related to **Figure 1**.

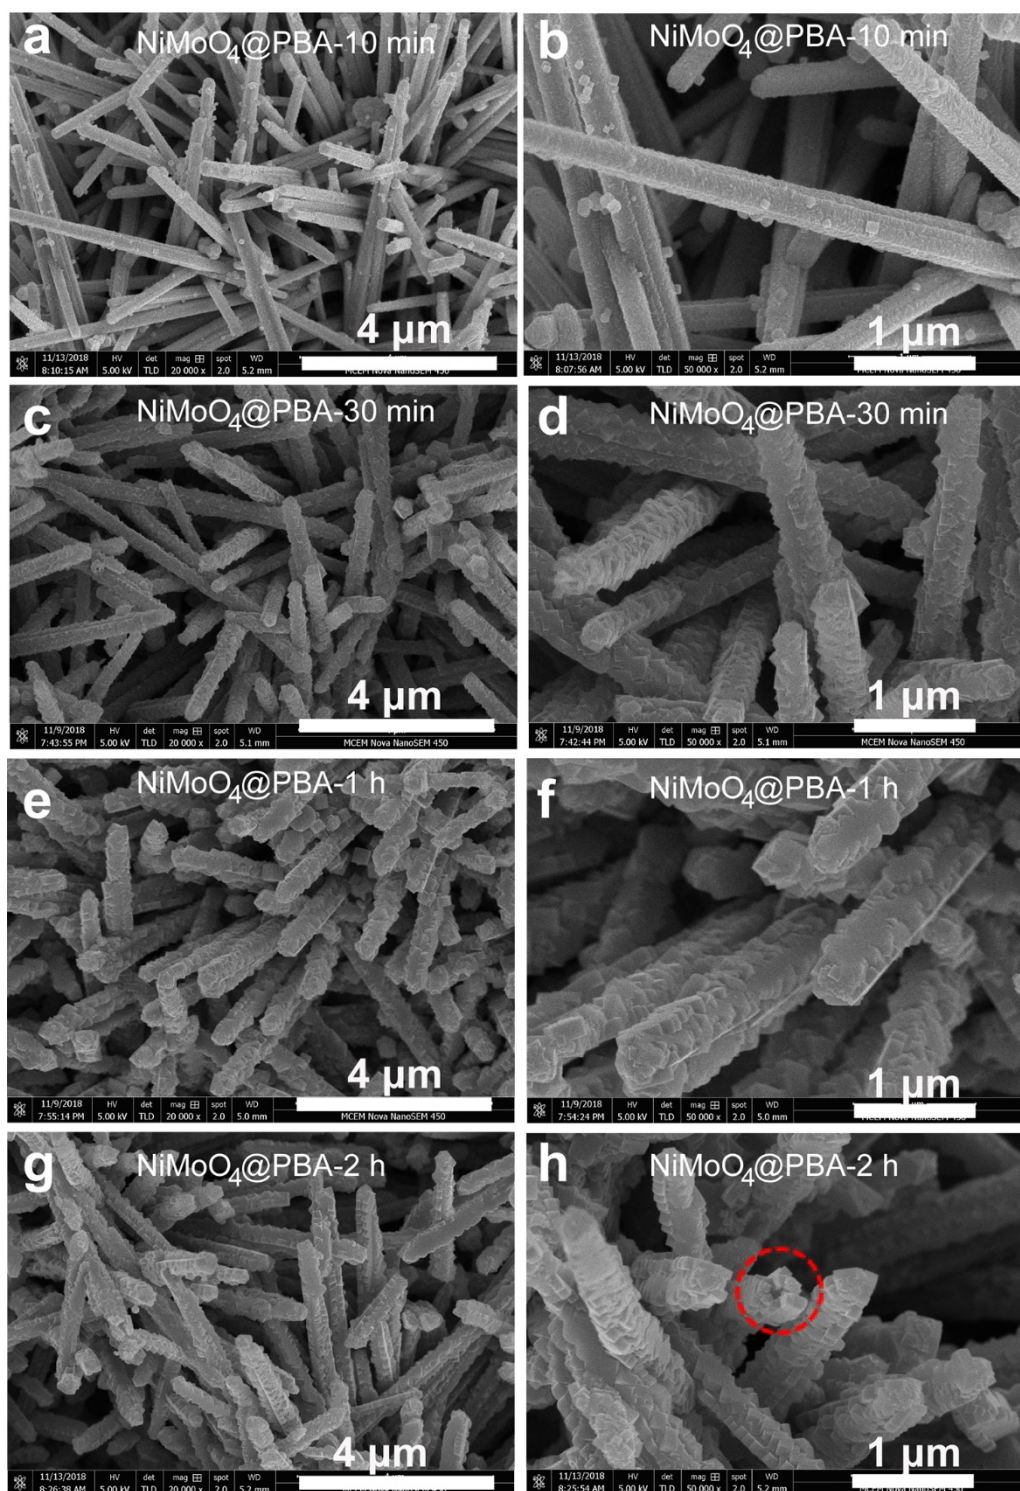

**Figure S2.** SEM images of NiMoO<sub>4</sub>@PBA-10 min (a, b), NiMoO<sub>4</sub>@PBA-30 min (c, d), NiMoO<sub>4</sub>@PBA-1 h (e, f) and NiMoO<sub>4</sub>@PBA-2 h (g, h), related to **Figure 1**.

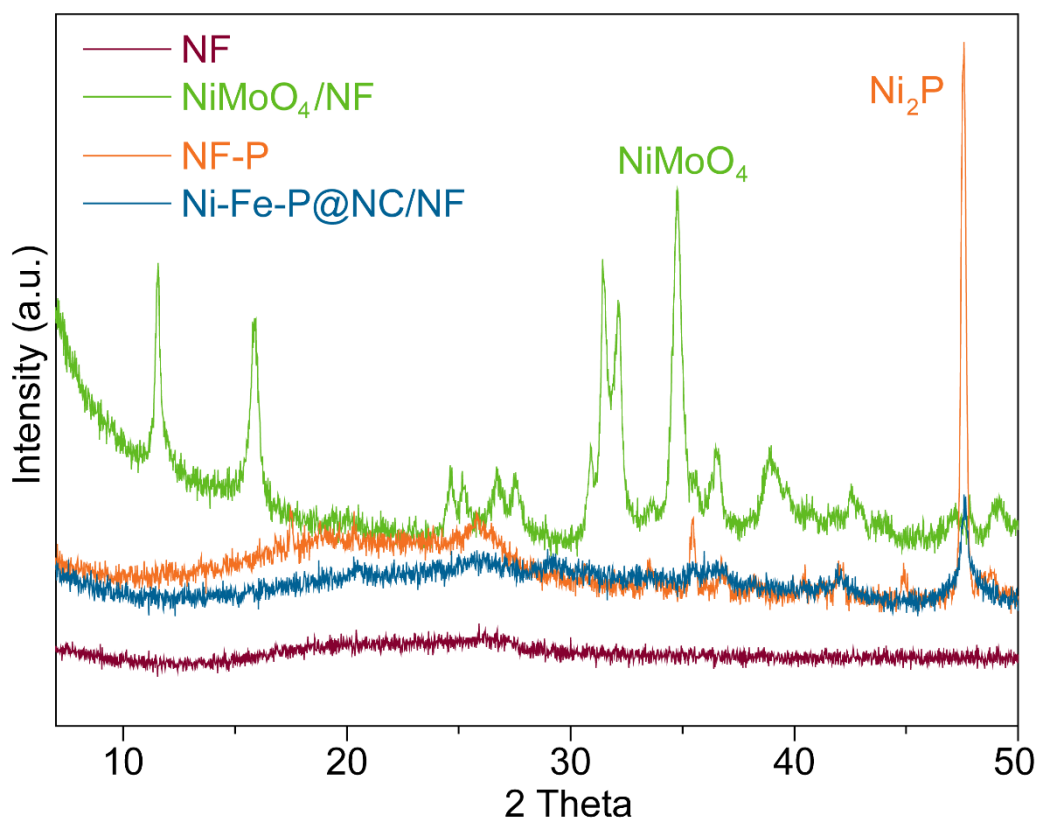

**Figure S3.** XRD patterns of Ni-Fe-P@NC/NF, NiMoO<sub>4</sub>/NF, NF after phosphidation and original NF, related to **Figure 2**.

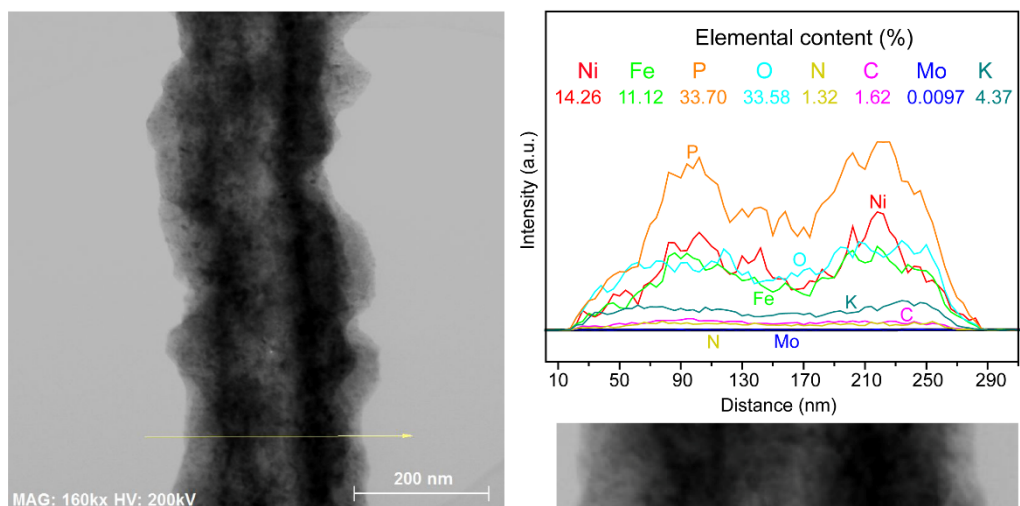

**Figure S4.** Line scan of Ni-Fe-P@NC nanotube and the elemental distribution on a radial direction, related to **Figure 2**.

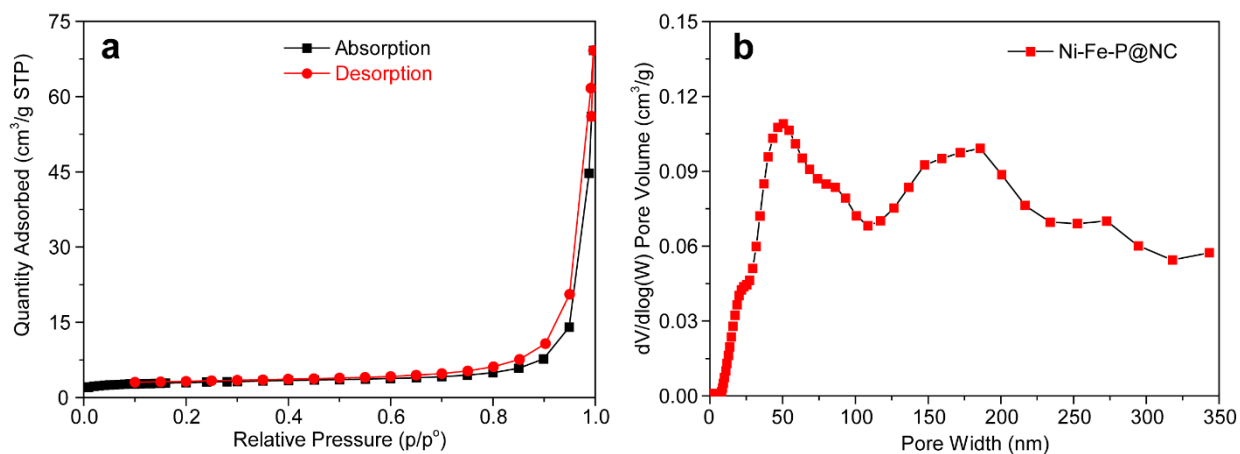

**Figure S5.** (a) N<sub>2</sub> adsorption-desorption isotherms and (b) corresponding pore size distribution plots of Ni-Fe-P@NC, related to **Figure 2**.

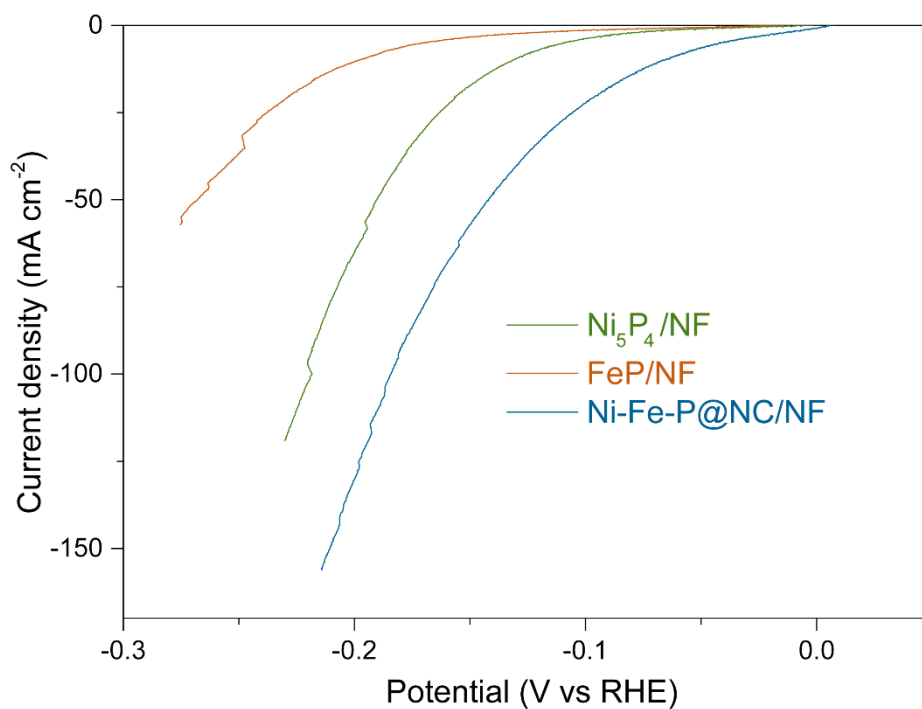

**Figure S6.** Linear sweep voltammetry (LSV) for HER comparison among Ni-Fe-P@NC/NF, Ni<sub>5</sub>P<sub>4</sub> and FeP, related to **Figure 3**.

### Faradaic efficiency

The Faradaic efficiency of hydrogen evolution reaction ( $FE_{HER}$ ) was calculated based on the equation:  $FE_{HER} = n_{H_2} \cdot 2 \cdot F / Q \cdot 100\%$

where  $n_{H_2}$  was the amount of  $H_2$  generated from HER,  $F$  was Faradaic constant and  $Q$  was the total charge applied on the working electrode.

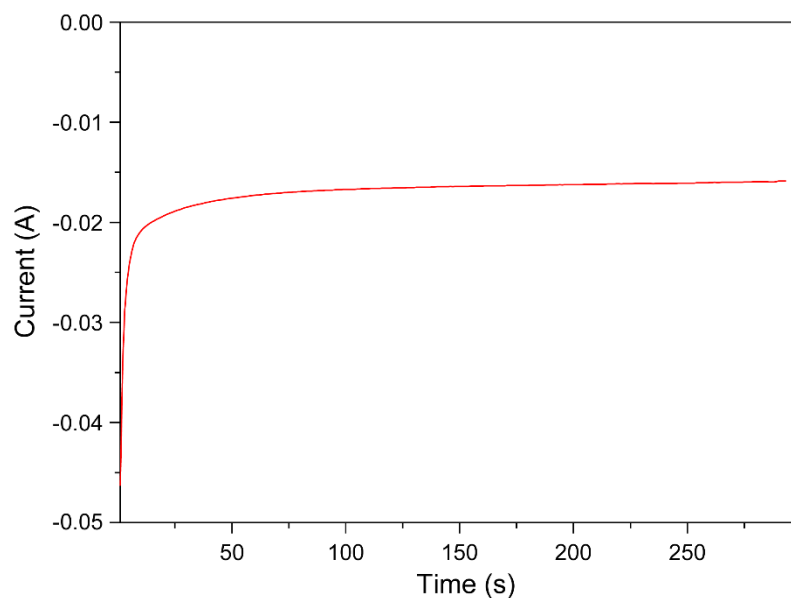

**Figure S7.** Chronoamperometric curves of Ni-Fe-P@NC/NF obtained at -0.1 V vs RHE for quantification of hydrogen, related to **Figure 3**.

When 5C of charge passed through the working electrode, the amount of obtained  $H_2$  was detected by GC, which was 25.2  $\mu\text{mol}$ . As there is systematic error including the relatively sealed electrochemical cell which might release  $H_2$  during the transport to the GC, the error bar is around  $\pm 3\%$ .

$$FE_{HER} = (25.2 \cdot 10^{-6} \text{ mol} \cdot 2 \cdot 96485 \text{ C} \cdot \text{mol}^{-1}) / 5\text{C} \cdot 100\% = 97.3\% \pm 3\%$$

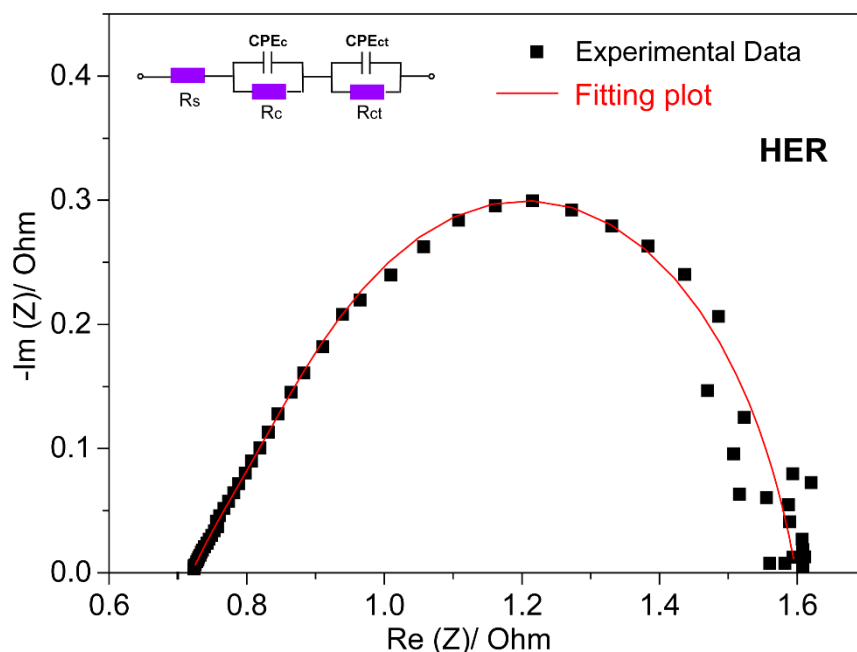

**Figure S8.** EIS Nyquist plots of Ni-Fe-P@NC/NF; inset: the corresponding equivalent circuit diagram, related to **Figure 3**.

$R_s$  is the uncompensated solution resistance,  $\text{CPE}_c$  and  $R_c$  are the constant element and resistance reflecting electron transport at the interface between Ni-Fe-P@NC and NF, respectively.  $\text{CPE}_{ct}$  and  $R_{ct}$  are the constant phase element and charge transfer resistance at the Ni-Fe-P/electrolyte interface, respectively.

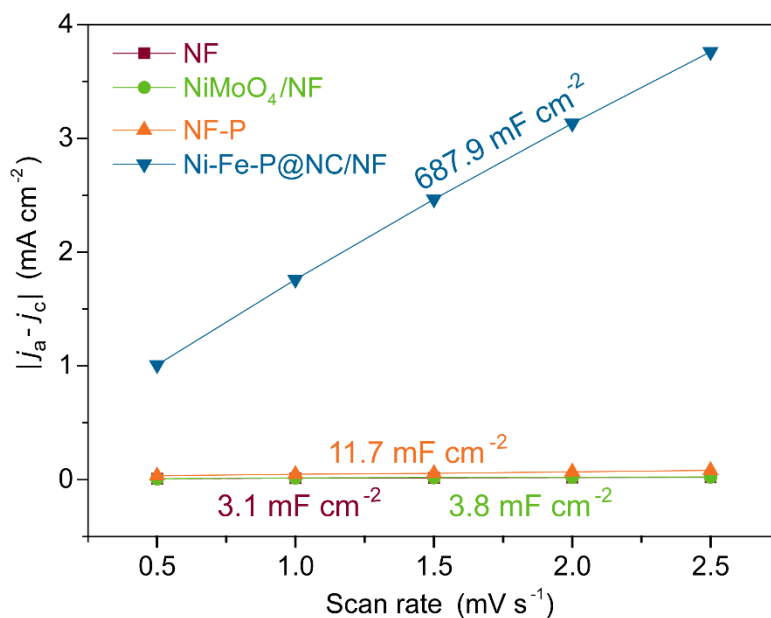

**Figure S9.** Plot showing the extraction of the double-layer capacitance ( $C_{dl}$ ) for NF,  $\text{NiMoO}_4/\text{NF}$ , NF-P and Ni-Fe-P@NC/NF at  $-0.85 \text{ V}$  vs Hg/HgO, related to **Figure 3**.

Normally, the specific capacitance for  $1 \text{ cm}^2$  of a flat surface is around  $20\text{-}60 \mu\text{F}\cdot\text{cm}^{-2}$  and the average value of  $40 \mu\text{F}\cdot\text{cm}^{-2}$  is generally used for calculations. The specific capacitance can be obtained from geometric current density collected from the rectangular CV plots at a certain potential of  $-0.85 \text{ V}$  vs Hg/HgO with a sweep rate from  $0.5$  to  $2.5 \text{ mV s}^{-1}$ .

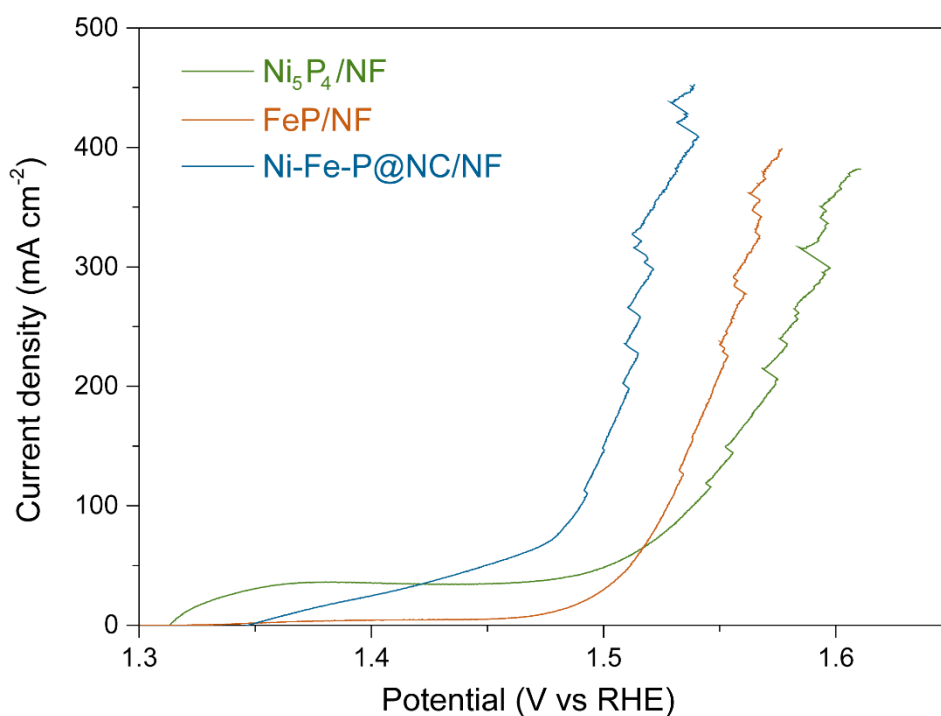

**Figure S10.** Linear sweep voltammetry (LSV) for OER comparison among Ni-Fe-P@NC/NF, Ni<sub>5</sub>P<sub>4</sub> and FeP, related to **Figure 4**.

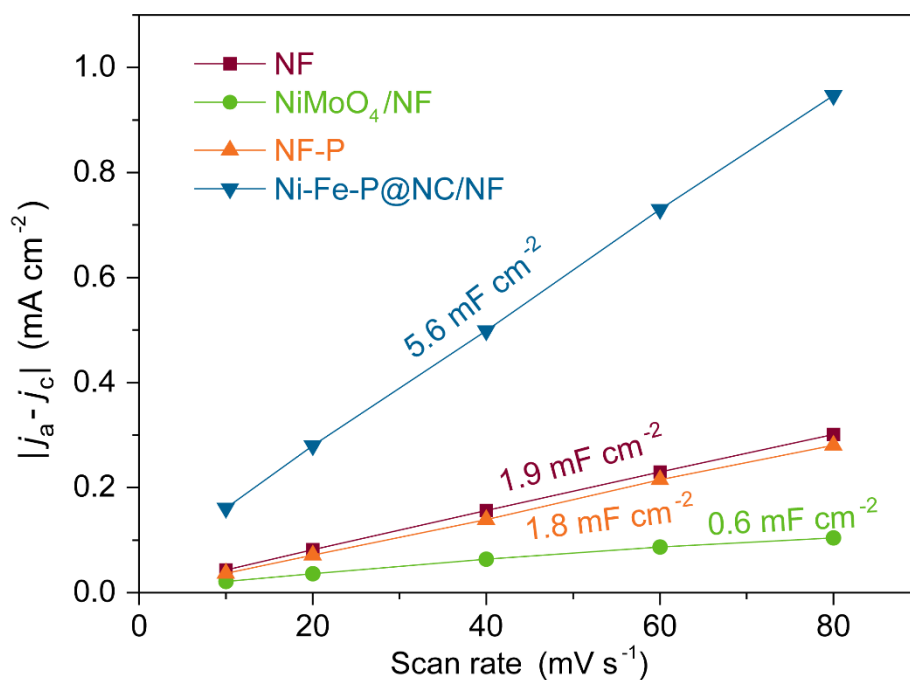

**Figure S11.** Plot showing the extraction of the double-layer capacitance ( $C_{dl}$ ) for NF, NiMoO<sub>4</sub>/NF, NF-P and Ni-Fe-P@NC/NF at 0.15 V vs Hg/HgO based on the CV curves at different scan rates with a potential range of 0.1~0.2 V vs Hg/HgO, related to **Figure 4**.



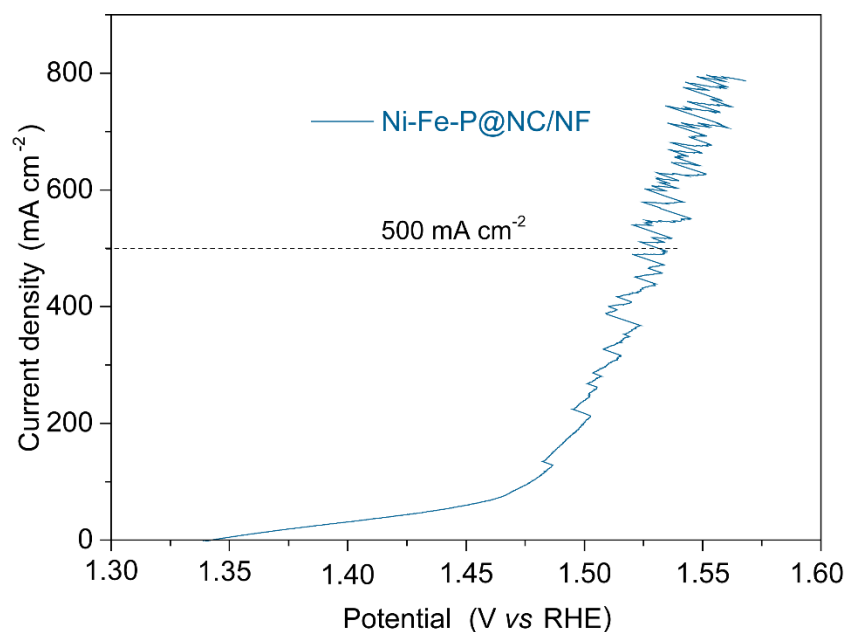

**Figure S12.** Linear sweep voltammetry (LSV) of Ni-Fe-P@NC/NF at higher potential LSV ( $500 \text{ mA cm}^{-2}$  at 296 mV), related to **Figure 4**.

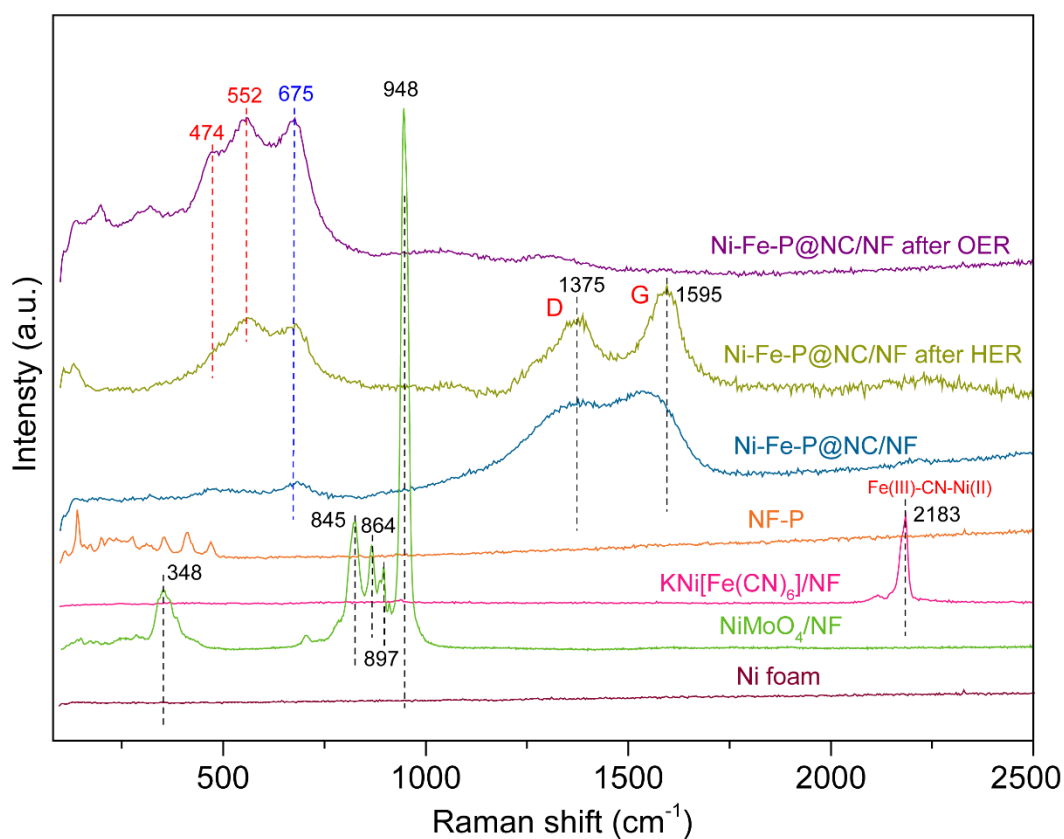

**Figure S13.** Raman spectra of Ni foam,  $\text{NiMoO}_4/\text{NF}$ ,  $\text{KNi}[\text{Fe}(\text{CN})_6]/\text{NF}$ , Ni-Fe-P@NC/NF, Ni-Fe-P@NC/NF after HER and Ni-Fe-P@NC/NF after OER, related to **Figure 2, 3 & 4**.

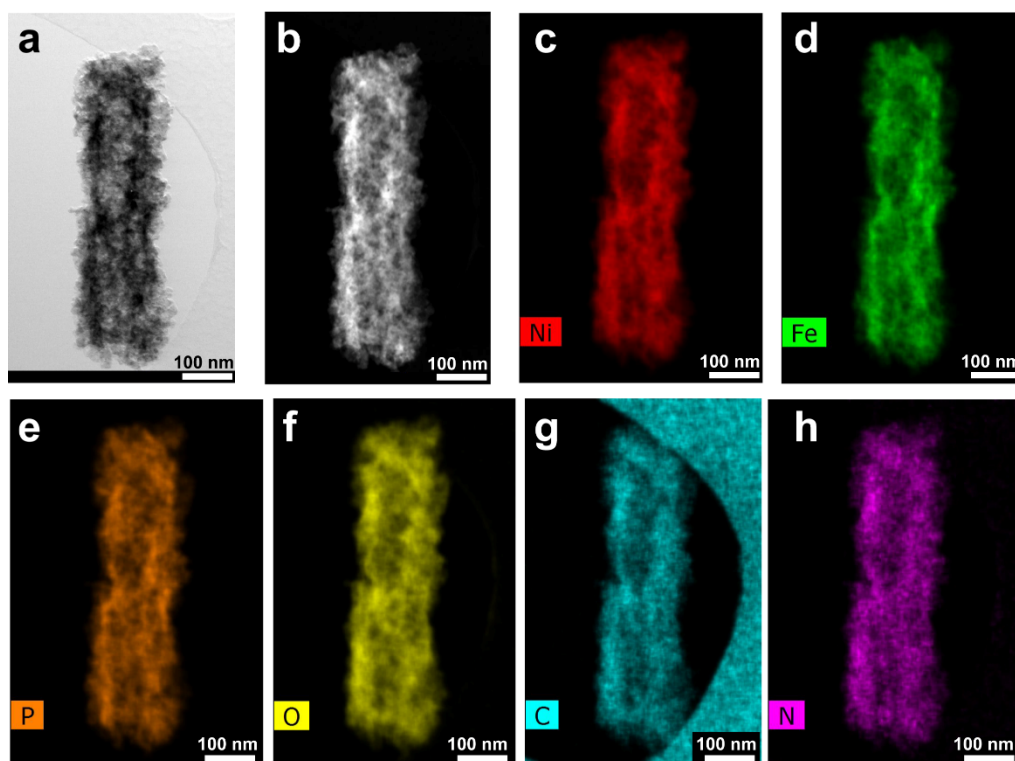

**Figure S14.** BF\_DF (a), HAADF (b) and elemental mapping of each element (c-h) along the Ni-Fe-P@NC nanotube after HER at  $-50 \text{ mA cm}^{-2}$  for 24 h. Scale bars are 100 nm, related to Figure 3.

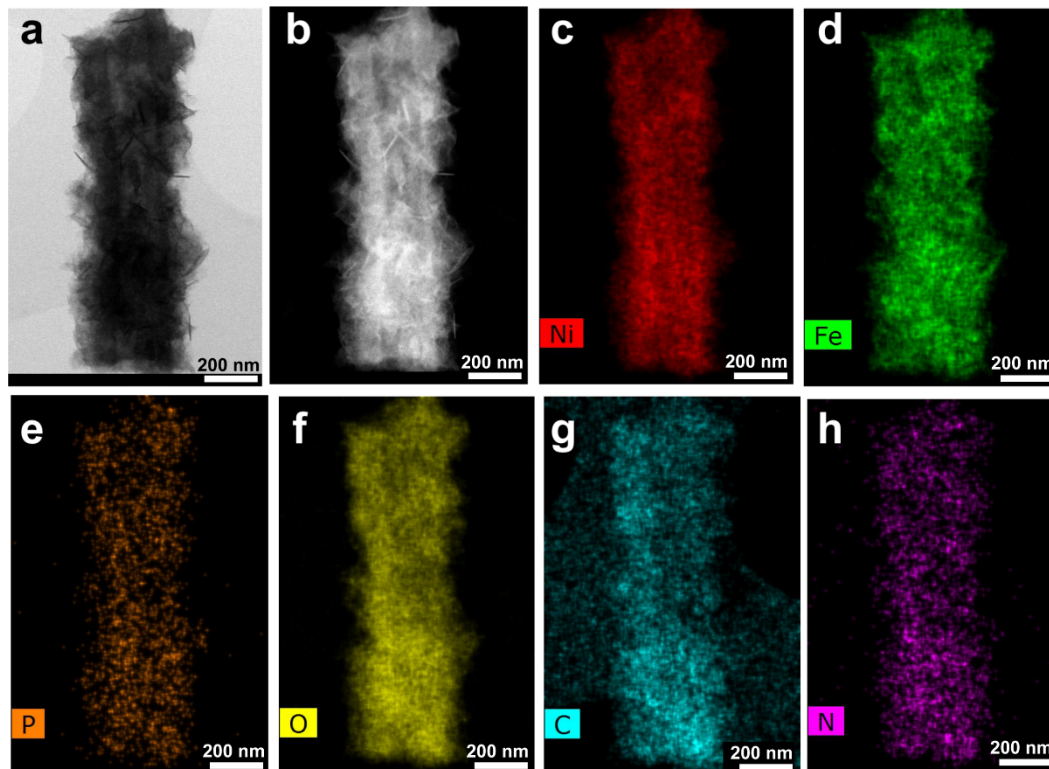

**Figure S15.** BF\_DF (a), HAADF (b) and elemental mapping of each elements (c-h) along the Ni-Fe-P@NC nanotube after OER at  $100 \text{ mA cm}^{-2}$  for 24 h. Scale bars are 200 nm, related to Figure 4.

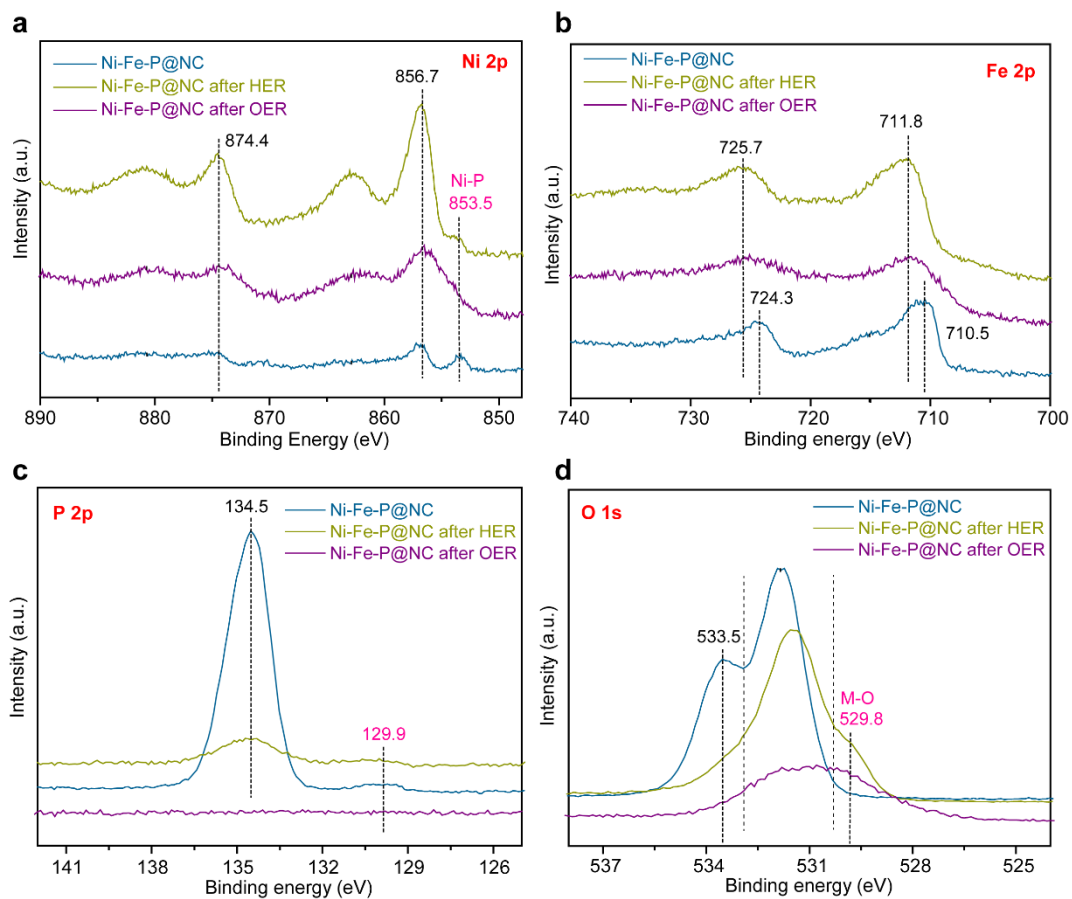

**Figure S16.** The XPS patterns of as-prepared Ni-Fe-P@NC sample, showing the signals of (a) Ni 2p, (b) Fe 2p, (c) P 2p and (d) O 1s, related to **Figure 2, 3 & 4**.

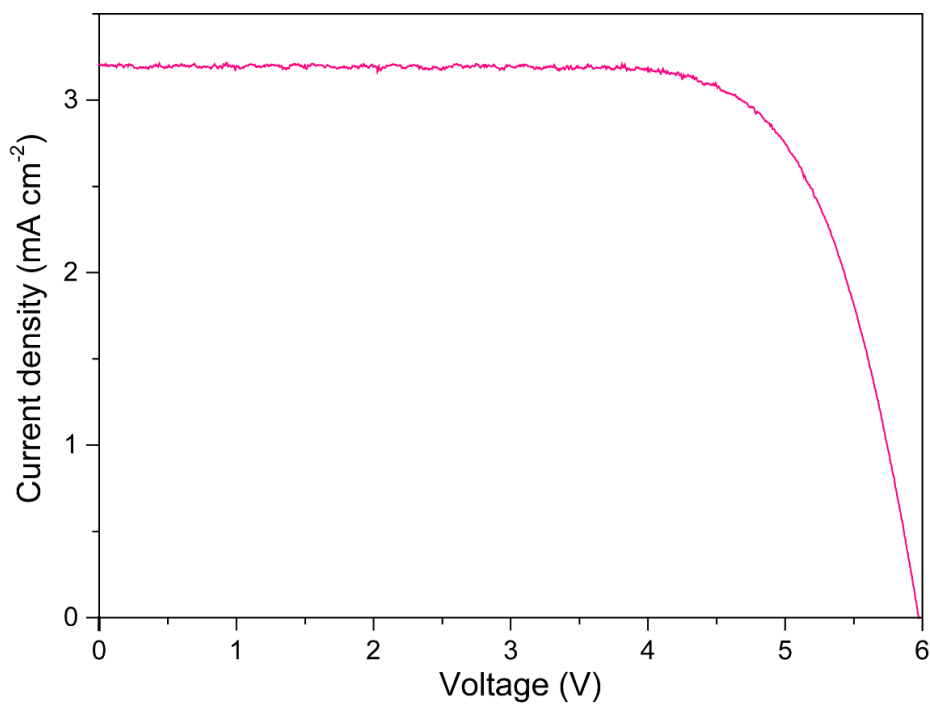

**Figure S17.** Current-voltage curve of a commercial silicon solar cell under simulated sunlight (1-sun illumination), related to **Figure 5**.

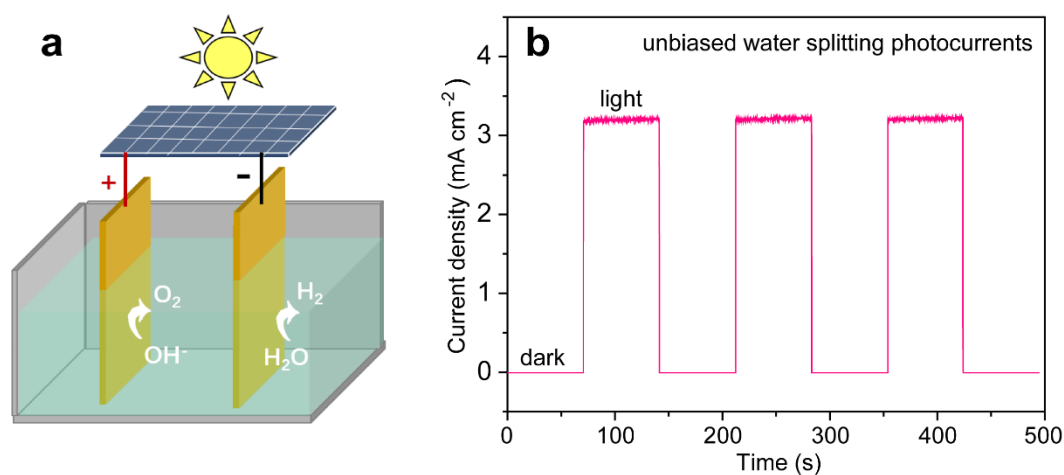

**Figure S18.** (a) Schematic diagram cell for photo water splitting. (b) Current density-time curve of the PV-EC device (1.0 M KOH) without external bias under chopped simulated AM 1.5 G  $100 \text{ mW cm}^{-2}$  illumination, related to **Figure 5**.

**Table S1. ICP-MS result of Mo in Ni-Fe-P@NC, related to Figure 1.**

| Analyte       | Mean Corrected Intensity | Calib. Conc. Units | Std. Dev. | Sample Conc. Units | Std. Dev. | RSD   |
|---------------|--------------------------|--------------------|-----------|--------------------|-----------|-------|
| Mo<br>202.031 | 2493.3                   | 0.044<br>mg/L      | 0.0004    | 0.044<br>mg/L      | 0.0004    | 0.81% |

As the concentration of the solution was 5 mg/L, the mass concentration of Mo in the solution or the sample was:  $w(\text{Mo}) = 0.044/5 = 0.88\%$  which demonstrates the total conversion from  $\text{NiMoO}_4$  to  $\text{KNiFe}(\text{CN})_6$ .

**Table S2. Values of elements circuit (Fig. S8) resulted from fitting the EIS data at -0.2 V vs RHE, related to Figure 3.**

| $R_s$<br>( $\Omega$ ) | $Q_c$<br>( $\text{F}\cdot\text{s}^{(a-1)}$ ) | $a_c$  | $R_c$  | $Q_{ct}$<br>( $\text{F}\cdot\text{s}^{(a-1)}$ ) | $n_{ct}$ | $R_{ct}$<br>( $\Omega$ ) |
|-----------------------|----------------------------------------------|--------|--------|-------------------------------------------------|----------|--------------------------|
| 0.7201                | 0.4107                                       | 0.5521 | 0.1093 | 0.2093                                          | 0.8502   | 0.6887                   |

**Table S3.** Comparison of HER activity for Ni-Fe-P@NC/NF and well-known Ni/Fe-based catalysts in 1.0 M KOH, related to **Figure 3**.

| Catalysts                                                                           | Substrate      | $\eta$ @ -10 mA cm <sup>-2</sup> (mV) | Tafel slope (mV dec <sup>-1</sup> ) | References                                                     |
|-------------------------------------------------------------------------------------|----------------|---------------------------------------|-------------------------------------|----------------------------------------------------------------|
| <b>Ni-Fe-P@NC</b>                                                                   | <b>Ni foam</b> | <b>65</b>                             | <b>81.0</b>                         | <b>This work</b>                                               |
| Ni <sub>2</sub> P@FePO <sub>x</sub>                                                 | Ni foam        | 75                                    | 67                                  | <i>Chem. Sci.</i> , <b>2018</b> , 9, 1375                      |
| NiFe NTAs                                                                           | Ni foam        | 181                                   | 147.0                               | <i>ACS Appl. Energy Mater.</i> <b>2018</b> , 1, 3, 1210-1217   |
| Ni/NiFe (oxy)hydroxide                                                              | Ni foam        | 210                                   | 71                                  | <i>ACS Appl. Mater. Interfaces</i> <b>2018</b> , 10, 8585–8593 |
| FePO <sub>4</sub> NW                                                                | Ni foam        | 42.7                                  | 104.5                               | <i>Adv. Mater.</i> <b>2017</b> , 29, 1704574                   |
| Mesoporous FeS <sub>2</sub> <sup>[b]</sup>                                          | Ni foam        | 96                                    | 78                                  | <i>J. Am. Chem. Soc.</i> <b>2017</b> , 139, 13604              |
| NiS <sub>2</sub> /CoS <sub>2</sub> -O NW                                            | CFP            | 174                                   | 45                                  | <i>Adv. Mater.</i> <b>2017</b> , 29, 1704681                   |
| MoS <sub>2</sub> / Fe <sub>5</sub> Ni <sub>4</sub> S <sub>8</sub>                   | FeNi foam      | 120                                   | 45.1                                | <i>Adv. Mater.</i> <b>2018</b> , 30, 1803151                   |
| 2D NiS <sub>2</sub>                                                                 | Ni foam        | 122                                   | 86                                  | <i>Nano Energy</i> <b>2017</b> , 41, 148                       |
| V-doped NiS <sub>2</sub>                                                            | Glass carbon   | 110                                   | 90                                  | <i>ACS Nano</i> <b>2017</b> , 11, 11574                        |
| NiFe/NiCo <sub>2</sub> O <sub>4</sub>                                               | Ni foam        | 105                                   | 88                                  | <i>Adv. Funct. Mater.</i> <b>2016</b> , 26, 3515               |
| Ni <sub>0.33</sub> Co <sub>0.67</sub> S <sub>2</sub> NW                             | Ti foil        | 88                                    | 118                                 | <i>Adv. Energy Mater.</i> <b>2015</b> , 5, 1402031             |
| Ni <sub>0.89</sub> Co <sub>0.11</sub> Se <sub>2</sub> MNS                           | Ni foam        | 85                                    | 52                                  | <i>Adv. Mater.</i> <b>2017</b> , 29, 1606521                   |
| Fe-Ni <sub>3</sub> S <sub>2</sub> /NF                                               | Ni foam        | 47                                    | 95                                  | <i>ACS Catal.</i> <b>2018</b> , 8, 5431–5441                   |
| Ni <sub>0.33</sub> Co <sub>0.67</sub> Se <sub>2</sub>                               | CFP            | 106                                   | 60                                  | <i>Adv. Energy Mater.</i> , <b>2017</b> , 7, 1602089           |
| V-doped NiS <sub>2</sub>                                                            | Glass carbon   | 110                                   | 90                                  | <i>ACS Nano</i> <b>2017</b> , 11, 11574                        |
| NF@Ni/C-600                                                                         | Ni foam        | 37                                    | 57                                  | <i>Energy Environ. Sci.</i> , <b>2018</b> , 11, 2363-2371      |
| Ni <sub>0.89</sub> Co <sub>0.11</sub> Se <sub>2</sub> MNS                           | Ni foam        | 85                                    | 52                                  | <i>Adv. Mater.</i> <b>2017</b> , 29, 1606521                   |
| Ni <sub>0.33</sub> Co <sub>0.67</sub> Se <sub>2</sub>                               | CFP            | 65                                    | 35                                  | <i>Adv. Energy Mater.</i> , <b>2017</b> , 7, 1602089           |
| Ni <sub>0.8</sub> Co <sub>0.1</sub> Fe <sub>0.1</sub> O <sub>x</sub> H <sub>y</sub> | Ni foam        | 85                                    | 84.5                                | <i>ACS Catal.</i> <b>2018</b> , 8, 5621–5629                   |
| Ni <sub>3</sub> FeN/r-GO                                                            | Ni foam        | 94                                    | 90                                  | <i>ACS Nano</i> <b>2018</b> , 12, 245–253                      |
| Ni@NC-800                                                                           | Ni foam        | 70                                    | 160                                 | <i>Adv. Mater.</i> <b>2017</b> , 29, 1605957                   |

Note: NT, Nanotube; NTAs, Nanotube Arrays; NW, Nanowire; MNS, Mesoporous nanosheet; NS, Nanosheet; CFP, Carbon fiber paper. [a]: N. A.=Not available.

**Table S4.** Comparison of OER activity for Ni-Fe-P@NC/NF and well-known Ni/Fe-based catalysts in 1.0 M KOH, related to **Figure 4**.

| Catalysts                                                                           | Substrate      | $\eta$ @ 10 mA cm <sup>-2</sup> (mV) | $\eta$ @ 50 mA cm <sup>-2</sup> (mV) | $\eta$ @ 100 mA cm <sup>-2</sup> (mV) | Tafel slope (mV dec <sup>-1</sup> ) | References                                                |
|-------------------------------------------------------------------------------------|----------------|--------------------------------------|--------------------------------------|---------------------------------------|-------------------------------------|-----------------------------------------------------------|
| <b>Ni-Fe-P@NC</b>                                                                   | <b>Ni foam</b> | <b>140</b>                           | <b>220</b>                           | <b>260</b>                            | <b>84.6</b>                         | <b>This work</b>                                          |
| Fe(PO <sub>3</sub> ) <sub>2</sub> /Ni <sub>2</sub> P                                | Ni foam        | 177                                  | N.A.                                 | N.A.                                  | 51.9                                | <i>PNAS</i> , <b>2017</b> , 114,5607-5611                 |
| Ni <sub>3</sub> Fe <sub>0.5</sub> V <sub>0.5</sub>                                  | CFP            | 200                                  | N.A.                                 | 264                                   | 39                                  | <i>Nat. Comm.</i> , <b>2018</b> , 9, 2885                 |
| Fe-Ni@NC-CNTs                                                                       | Ni foam        | 202                                  | N.A.                                 | N.A.                                  | 45.5                                | <i>Angew. Chem.</i> <b>2018</b> , 130, 9059-9064          |
| MoS <sub>2</sub> /Fe <sub>5</sub> Ni <sub>4</sub> S <sub>8</sub>                    | FeNi foam      | 204                                  | N.A.                                 | N.A.                                  | 28.1                                | <i>Adv. Mater.</i> <b>2018</b> , 30, 1803151              |
| Ni <sub>2</sub> P@FePO <sub>x</sub>                                                 | Ni foam        | 205                                  | N.A.                                 | 230                                   | 32                                  | <i>Chem. Sci.</i> , <b>2018</b> , 9, 1375                 |
| Fe-Ni <sub>3</sub> S <sub>2</sub> /NF                                               | Ni foam        | 214                                  | N.A.                                 | 249                                   | 42                                  | <i>ACS Catal.</i> <b>2018</b> , 8, 5431-5441              |
| FePO <sub>4</sub> NW                                                                | Ni foam        | 218                                  | N.A.                                 | N.A.                                  | 42.72                               | <i>Adv. Mater.</i> <b>2017</b> , 29, 1704574              |
| Ni:Pi-Fe                                                                            | Ni foam        | 220                                  | N.A.                                 | N.A.                                  | 37                                  | <i>Chem. Mater.</i> <b>2016</b> , 28, 5659-5666           |
| Ni(OH) <sub>2</sub> -CeO <sub>2</sub>                                               | Carbon paper   | 220                                  | N.A.                                 | N.A.                                  | 81.9                                | <i>ACS Nano</i> <b>2018</b> , 12, 6245-6251               |
| NiS <sub>2</sub> /CoS <sub>2</sub> -O NW                                            | CFP            | 235                                  | N.A.                                 | N.A.                                  | 31                                  | <i>Adv. Mater.</i> <b>2017</b> , 29, 1704681              |
| Ni <sub>0.8</sub> Co <sub>0.1</sub> Fe <sub>0.1</sub> O <sub>x</sub> H <sub>y</sub> | Ni foam        | 239                                  | 288                                  | N.A.                                  | 45.4                                | <i>ACS Catal.</i> <b>2018</b> , 8, 5621-5629              |
| NiFe-MOF                                                                            | Ni foam        | 240                                  | N.A.                                 | N.A.                                  | 34                                  | <i>Nat. Commun.</i> <b>2017</b> , 8, 15341                |
| Ni <sub>1</sub> Fe <sub>2</sub> -O                                                  | GCE            | 244                                  | N.A.                                 | N.A.                                  | 39                                  | <i>Adv. Energy Mater.</i> <b>2018</b> , 8, 1701347        |
| NF@Ni/C-600                                                                         | Ni foam        | 265                                  | 353                                  | N.A.                                  | 54                                  | <i>Energy Environ. Sci.</i> , <b>2018</b> , 11, 2363-2371 |
| Ni <sub>3</sub> FeN/r-GO                                                            | Ni foam        | 270                                  | 298                                  | N.A.                                  | 54                                  | <i>ACS Nano</i> <b>2018</b> , 12, 245-253                 |

|                                                          |              |     |      |      |      |                                                         |
|----------------------------------------------------------|--------------|-----|------|------|------|---------------------------------------------------------|
| Ni-Co-P HNBs                                             | Ni foam      | 270 | N.A. | N.A. | 76   | <i>Energy Environ. Sci.</i> , <b>2018</b> , 11, 872-880 |
| Ni <sub>2</sub> P <sub>4</sub> O <sub>12</sub>           | carbon cloth | 270 | N.A. | N.A. | 207  | <i>Adv. Mater.</i> <b>2018</b> , 30, 1705045            |
| Ni@NC-800                                                | Ni foam      | 280 | N.A. | N.A. | 45   | <i>Adv. Mater.</i> <b>2017</b> , 29, 1605957            |
| Ni <sub>1-x</sub> Fe <sub>x</sub> PS <sub>3</sub> @MXene | GC           | 282 | N.A. | N.A. | 36.5 | <i>Adv. Energy Mater.</i> <b>2018</b> , 8, 1801127      |
| V-doped NiS <sub>2</sub>                                 | Glass carbon | 290 | N.A. | N.A. | 45   | <i>ACS Nano</i> <b>2017</b> , 11, 11574                 |

CFP: Carbon fiber paper; GCE: glassy carbon electrode

**Table S5.** Summary of overall-water-splitting performance in 1.0 M KOH of various state-of-the-art Ni/Fe based bifunctional electro-catalysts, related to **Figure 5**.

| Bifunctional catalysts                                                              | Substrate | $E_{J=10}$ (V) | Durability (h) | References                                          |
|-------------------------------------------------------------------------------------|-----------|----------------|----------------|-----------------------------------------------------|
| <b>Ni-Fe-P@NC</b>                                                                   | <b>NF</b> | <b>1.47</b>    | <b>100</b>     | <b>This work</b>                                    |
| Ni <sub>2</sub> P@FePO <sub>x</sub>                                                 | Ni foam   | 1.51           | 100            | <i>Chem. Sci.</i> , <b>2018</b> , 9, 1375           |
| Fe <sub>0.09</sub> Co <sub>0.13</sub> -NiSe <sub>2</sub> NS                         | CFC       | 1.52           | 30             | <i>Adv. Mater.</i> <b>2018</b> , 30, 1802121        |
| NiFe LDH/Cu NW                                                                      | Cu foam   | 1.54           | 48             | <i>Energy Environ. Sci.</i> <b>2017</b> , 10, 1820  |
| FePO <sub>4</sub> NW                                                                | Ni foam   | 1.54           | 15             | <i>Adv. Mater.</i> <b>2017</b> , 29, 1704574        |
| Fe-Ni <sub>3</sub> S <sub>2</sub> /NF                                               | Ni foam   | 1.54           | 10             | <i>ACS Catal.</i> <b>2018</b> , 8, 5431-5441        |
| NiFe-MOF                                                                            | Ni foam   | 1.55           | 20             | <i>Nat. Commun.</i> <b>2017</b> , 8, 15341          |
| Holey NiCoP NS                                                                      | Ni foam   | 1.56           | 6              | <i>J. Am. Chem. Soc.</i> <b>2018</b> , 140, 5241    |
| V-doped NiS <sub>2</sub>                                                            | Ni foam   | 1.56           | 20             | <i>ACS Nano</i> <b>2017</b> , 11, 1157              |
| NC-NiCu-NiCuN                                                                       | Ni foam   | 1.56           | 50             | <i>Adv. Funct. Mater.</i> <b>2018</b> , 28, 1803278 |
| NFN-MOF/NF <sup>a</sup>                                                             | Ni foam   | 1.56           | 30             | <i>Adv. Energy Mater.</i> <b>2018</b> , 8, 1801065  |
| NiFeSP                                                                              | Ni foam   | 1.58           | 20             | <i>ACS Nano</i> <b>2017</b> , 11, 10303             |
| IFONFs-45                                                                           | Fe foil   | 1.58           | 8.3            | <i>Nat. Commun.</i> <b>2018</b> , 9, 1809           |
| Ni <sub>0.8</sub> Co <sub>0.1</sub> Fe <sub>0.1</sub> O <sub>x</sub> H <sub>y</sub> | Ni foam   | 1.58           | 50             | <i>ACS Catal.</i> <b>2018</b> , 8, 5621-5629        |



|                                                                             |                          |       |       |                                                      |
|-----------------------------------------------------------------------------|--------------------------|-------|-------|------------------------------------------------------|
| NiCoP films                                                                 | Scrap copper wires       | 1.59  | 24    | <i>Adv. Energy Mater.</i> <b>2018</b> , 1802615      |
| Ni <sub>0.75</sub> Fe <sub>0.125</sub> V <sub>0.125</sub> <sup>-</sup> LDHs | Ni foam                  | 1.591 | 15    | <i>Small</i> <b>2018</b> , 14, 1703257               |
| Ni <sub>3</sub> FeN/r-GO                                                    | Ni foam                  | 1.60  | 100   | <i>ACS Nano</i> <b>2018</b> , 12, 245–253            |
| Se-(NiCo)S <sub>x</sub> /(OH) <sub>x</sub> NS                               | Ni foam                  | 1.6   | 66    | <i>Adv. Mater.</i> <b>2018</b> , 30, 1705538         |
| Fe-CoP                                                                      | Ti foil                  | 1.6   | 40    | <i>Adv. Mater.</i> <b>2017</b> , 29, 1602441         |
| Ni@NC-800                                                                   | Ni foam                  | 1.6   | 50    | <i>Adv. Mater.</i> <b>2017</b> , 29, 1605957         |
| Ni-Co-P HNB                                                                 | Ni foam                  | 1.62  | 20    | <i>Energy Environ. Sci.</i> , <b>2018</b> , 11, 872  |
| Ni <sub>3</sub> Se <sub>2</sub> /Co <sub>9</sub> S <sub>8</sub>             | Exfoliated graphene foil | 1.62  | 10    | <i>Nano Lett.</i> <b>2017</b> , 17, 4202             |
| Ni-P                                                                        | CFP                      | 1.63  | 100   | <i>Adv. Funct. Mater.</i> <b>2016</b> , 26, 4067     |
| NiCo <sub>2</sub> S <sub>4</sub> NW                                         | Ni foam                  | 1.63  | 50    | <i>Adv. Funct. Mater.</i> <b>2016</b> , 26, 4661     |
| Ni <sub>2</sub> P NP                                                        | Ni foam                  | 1.63  | 10    | <i>Energy Environ. Sci.</i> <b>2015</b> , 8, 2347    |
| Ni <sub>2</sub> Fe <sub>1</sub> -O                                          | Ni foam                  | 1.64  | 10    | <i>Adv. Energy Mater.</i> <b>2018</b> , 8, 1701347   |
| Ni <sub>1-x</sub> Fe <sub>x</sub> PS <sub>3</sub> @MXene                    | Ni foam                  | 1.65  | 50    | <i>Adv. Energy Mater.</i> <b>2018</b> , 8, 1801127   |
| FeS NS                                                                      | Iron foam                | 1.65  | 50    | <i>Chem</i> <b>2018</b> , 4, 1139                    |
| Hierarchical NiCo <sub>2</sub> O <sub>4</sub>                               | Ni foam                  | 1.65  | 15    | <i>Angew. Chem. Int. Ed.</i> <b>2016</b> , 55, 6290  |
| Ni-P(Ni <sub>11</sub> (HPO <sub>3</sub> ) <sub>8</sub> (OH) <sub>6</sub> )  | Ni foam                  | 1.65  | 100   | <i>Energy Environ. Sci.</i> , <b>2018</b> , 11, 1287 |
| Co <sub>0.85</sub> Se/NiFe-LDH                                              | Exfoliated graphene foil | 1.67  | 10    | <i>Energy Environ. Sci.</i> <b>2016</b> , 9, 478     |
| NiFe/NiCo <sub>2</sub> O <sub>4</sub>                                       | Ni foam                  | 1.67  | 10    | <i>Adv. Funct. Mater.</i> <b>2016</b> , 26, 3515     |
| Ni <sub>5</sub> P <sub>4</sub>                                              | Ni foil                  | ~1.69 | N. A. | <i>Angew. Chem. Int. Ed.</i> <b>2015</b> , 54, 12361 |
| NiSe                                                                        | Ni foam                  | 1.69  | N.A.  | <i>Adv. Energy Mater.</i> <b>2018</b> , 8, 1702704   |
| NiFe LDH                                                                    | Ni foam                  | 1.70  | 10    | <i>Science</i> <b>2014</b> , 345, 1593               |
| FeSe <sub>2</sub>                                                           | Ni foam                  | 1.72  | 24    | <i>Angew. Chem. Int. Ed.</i> <b>2017</b> , 56, 10506 |
| NiS <sub>2</sub> /CoS <sub>2</sub> -O                                       | CFP                      | ~1.77 | 21    | <i>Adv. Mater.</i> <b>2017</b> , 29, 1704681         |

<sup>a</sup>NFN: NH<sub>2</sub>-MIL-88B(Fe<sub>2</sub>Ni) MOF

## Transparent Methods

**Chemicals and synthesis:**  $\text{NaMoO}_4 \cdot 2\text{H}_2\text{O}$ ,  $\text{Ni}(\text{NO}_3)_2 \cdot 6\text{H}_2\text{O}$ ,  $\text{NaH}_2\text{PO}_2$ ,  $\text{K}_3[\text{Fe}(\text{CN})_6]$ ,  $\text{FeSO}_4 \cdot 7\text{H}_2\text{O}$ , glycerol,  $\text{NH}_4\text{F}$ , Pt/C,  $\text{RuO}_2$  and Nafion 117 solution were purchased from Sigma Aldrich. KOH pellets were purchased from Merck KGaA. MilliQ water with a resistivity  $\geq 18 \text{ M}\Omega$  was used to prepare all aqueous solutions. All the reagents were used without further purification.

### **Synthesis of $\text{NiMoO}_4$ and $\text{NiMoO}_4$ @PBA-XX on nickel foam**

$\text{NiMoO}_4$  nanowires were synthesized by a modified hydrothermal method. Firstly, 0.242 g of  $\text{NaMoO}_4 \cdot 2\text{H}_2\text{O}$  (1.0 mmol) and 0.291 g of  $\text{Ni}(\text{NO}_3)_2 \cdot 6\text{H}_2\text{O}$  (1.0 mmol) were mixed together with 33 ml of MilliQ water and stirred for 20 min to obtain a precursor solution. Meanwhile, Ni foam cut into  $1.0 \times 3.0 \text{ cm}^2$  was sonicated in 3.0 M HCl for 10 min and then put in the Teflon lined autoclave with the above-prepared solution. Then the autoclave was further placed in an oven at  $150^\circ\text{C}$  for 4 h. After the reaction, the green powder was grown on Ni foam (denote as  $\text{NiMoO}_4/\text{NF}$ ), rinsed for 3 times with distilled water and ethanol and then oven-dried at  $80^\circ\text{C}$ . The prepared  $\text{NiMoO}_4/\text{NF}$  was weighed before transferred into a 25 mL-vial with 16 mL 8.0 mg/mL of freshly prepared  $\text{K}_3[\text{Fe}(\text{CN})_6]$  solutions. The vial contained  $\text{NiMoO}_4/\text{NF}$  was put in the oven at  $90^\circ\text{C}$  for the different duration (*i.e.* 10, 30, 60 and 120 min) and obtained  $\text{NiMoO}_4$ @PBA-10 min/NF,  $\text{NiMoO}_4$ @PBA-30 min/NF,  $\text{NiMoO}_4$ @PBA-1h/NF and  $\text{NiMoO}_4$ @PBA-2h/NF.

### **Synthesis of Ni-Fe-P@NC nanotubes on nickel foam**

In the process of phosphidation step, two quartz boats, with 0.5 g of  $\text{NaH}_2\text{PO}_2$  in the left boat and a piece of  $\text{NiMoO}_4$ @PBA-2h/NF ( $1 \times 1.5 \text{ cm}^2$ ) in the right one, were placed in a stream of nitrogen in the furnace at  $350^\circ\text{C}$  for 2 h, where  $\text{NaH}_2\text{PO}_2$  acted as the phosphorous source (denoted as Ni-Fe-P@NC/NF) and the CN group in PBA served as the C and N sources.

### **Synthesis of $\text{Ni}_5\text{P}_4$ on nickel foam**

According to the method reported by Ge and co-workers (Ge et al, 2018),  $\text{Ni}(\text{NO}_3)_2 \cdot 6\text{H}_2\text{O}$  (1 mmol, 0.291 g), urea (5 mmol, 0.3 g) and  $\text{NH}_4\text{F}$  (2 mmol, 0.074 g) were dissolved in water (20 mL) to obtain the precursor solution. Then a piece of clean nickel foam ( $1.0 \times 3.0 \text{ cm}^2$ ) was placed in a Teflon-lined stainless steel autoclave which was immersed in the precursor solution, followed by heating them at  $90^\circ\text{C}$  for 12 h in an electric oven. After reaction, the obtained  $\text{Ni}(\text{OH})_2/\text{NF}$  was cut into  $1.0 \times 1.5 \text{ cm}^2$  and phosphidated at  $350^\circ\text{C}$  for 2 h.

### **Synthesis of FeP**

According to the literature (Wang et al, 2019),  $\text{FeSO}_4 \cdot 7\text{H}_2\text{O}$  (0.24g) and glycerol (2.5 mL) were dissolved in water (60 mL) which were further stirred for 30 minutes. Then the obtained solution was transferred into Teflon-lined stainless steel autoclaves, followed by heating them at  $110^\circ\text{C}$  for 12 h in an electric oven. After heating, the autoclave was turned off and cooled down naturally to room temperature. Then the target products ( $\alpha\text{-FeOOH}$ ) were collected by centrifugation, followed by drying at  $70^\circ\text{C}$  for several hours.

The obtained  $\alpha\text{-FeOOH}$  and  $\text{NaH}_2\text{PO}_2$  were mixed together and placed in a quartz boat which was placed in the middle of the oven. The atomic ratio for Fe to P is 1:10. Subsequently, the sample was heated at  $350^\circ\text{C}$  for 120 min at a heating rate of  $5^\circ\text{C min}^{-1}$  in a flow  $\text{N}_2$  atmosphere, and then naturally cooled to the room temperature. The obtained products were washed and collected by centrifugation. Finally, the powders were dried at  $60^\circ\text{C}$  for 12 h.

**Material characterizations.** Phase fractions were determined using X-ray diffraction (XRD) and the data of all the materials were collected with Co K $\alpha$  radiation on a Bruker D8 Advance eco diffractometer with a Lynxeye XE energy discrimination position-sensitive detector.

The morphologies of as-prepared samples were characterized by Scanning electron microscopy (SEM) using an FEI Nova NanoSEM at 5 kV. Conventional transmission electron microscopy (TEM) was carried out using a Tecnai T20 Twin operated at 200 kV with samples made by evaporating a drop of dispersions of the sub-micron wires in butanol onto holey-carbon-coated Cu grids. A Tecnai F20 SuperTwin operating at 200 kV was used to obtain scanning transmission electron microscopy (STEM) images and energy-dispersive spectrum (EDS) maps. STEM and TEM employed the same sample preparation process.

The Raman measurements were performed on a Renishaw Invia Raman microscope fitted with 488 nm Modulaser triple line argon-ion laser and a Coherent Inc 633 nm (red) HeNe laser.

"100%" power delivery would correspond to about 1mW on a 1  $\mu\text{m}$  diameter spot of the sample. Use 5-10% of the power is fairly common to reduce the chance of sample heating damage. X-ray photoelectron spectroscopy (XPS) analysis was performed using either an AXIS Nova or an AXIS Ultra spectrometer (Kratos Analytical Inc., Manchester, UK) with a monochromated Al K $\alpha$  source using the standard aperture (analysis area: 0.3 mm  $\times$  0.7 mm).

**Pre-treatments for ICP-MS test.** PerkinElmer Optima 8300 was applied for testing the content of Mo in Ni-Fe-P@NC. Standard solutions with a series of concentrations of 0.1, 1, 5 and 10 ppm were prepared and tested to obtain the standard curve. Then 1 mg of sample was weighed and placed in a beaker where 4 mL of aqua regia was added to dissolve the sample. The obtained solution was heated and concentrated to 500  $\mu\text{L}$  and diluted to suitable concentrations such as 100 ppm or 200 ppm. Then solution was further diluted to 5 ppm for ICP-MS test.

**Electrochemical measurements.** A three-electrode system was set up with Ni-Fe-P@NC/NF (1.0\*1.0  $\text{cm}^2$ ) clipped by a platinum clip as the working electrode, a graphite rod and Hg/HgO as the counter electrode and the reference electrode, respectively, in 1.0 M KOH. To prepare Pt/C and RuO $_2$  electrode, 10 mg of Pt/C or RuO $_2$  powders with 1 mL of ethanol and 50  $\mu\text{L}$  of Nafion 117 solution were placed in 1.5 mL vial and was then sonicated for 5 minutes. 300  $\mu\text{L}$  of the obtained Pt/C or RuO $_2$  suspension were dropped on a piece of Ni foam with a mass loading size of 1.0\*1.0  $\text{cm}^2$  and dried in the fume cupboard. The FeP electrode was fabricated by suspending 12 mg of FeP particles in 1 mL of ethanol with 60  $\mu\text{L}$  of Nafion 117 solution by sonication. Then, 0.5 mL of suspension was dropped on the nickel foam (1.0\*1.0  $\text{cm}^2$ ) and dried in the fume cupboard. The electrochemical catalytic activity of Ni-Fe-P@NC/NF in 1.0 M KOH was evaluated by the polarization curves from linear sweep voltammetry (LSV) with a scan rate of 5  $\text{mV s}^{-1}$ . All the potential values presented in this work were  $iR$ -corrected (aiming to remove the ohmic potential drop;  $C_{\text{correction}} = E_{\text{measure}} - iR$ ) and referenced to the hydrogen electrode (RHE) unless indicated otherwise. The Frequency range for Electrochemical Impedance Spectroscopy (EIS) is from 100 kHz to 10 mHz on SP 150 (BioLogic). For comparison, the same measurements were performed on NF, NiMoO $_4$ /NF and NF-P. To study the solar-to-hydrogen conversion, Ni-Fe-P@NC/NF acted as both the anode and cathode in the two-electrode system which connected to a commercial planar silicon photovoltaic ( $V_{\text{oc}} = 6.0 \text{ V}$ ) working as the power source (illumination by 100  $\text{mW cm}^{-2}$  simulated sunlight (1.5 G) for solar-to-hydrogen generation without external bias (Chen et al, 2010; Cox et al, 2014; Kuang et al, 2016; Luo et al, 2014).

## Supplemental References

- Chen, Z., Jaramillo, T. F., Deutsch, T. G., Kleiman-Shwarsctein, A., Forman, A. J., Gaillard, N., Garland, R., Takanabe, K., Heske, C., Sunkara, M., McFarland, E. W., Domen, K., Miller, E. L., Turner, J. A. & Dinh, H. N. (2010) Accelerating materials development for photoelectrochemical hydrogen production: Standards for methods, definitions, and reporting protocols. *Journal of Materials Research*, 25(1), 3-16.
- Cox, C. R., Lee, J. Z., Nocera, D. G. & Buonassisi, T. (2014) Ten-percent solar-to-fuel conversion with nonprecious materials. *Proceedings of the National Academy of Sciences*, 111(39), 14057-14061.
- Ge, Y., Dong, P., Craig, S. R., Ajayan, P. M., Ye, M. & Shen, J. (2018) Transforming Nickel Hydroxide into 3D Prussian Blue Analogue Array to Obtain Ni $_2$ P/Fe $_2$ P for Efficient Hydrogen Evolution Reaction. *Advanced Energy Materials*, 8(21), 1800484.
- Kuang, M., Han, P., Wang, Q., Li, J. & Zheng, G. (2016) CuCo Hybrid Oxides as Bifunctional Electrocatalyst for Efficient Water Splitting. *Advanced Functional Materials*, 26(46), 8555-8561.
- Luo, J., Im, J.-H., Mayer, M. T., Schreier, M., Nazeeruddin, M. K., Park, N.-G., Tilley, S. D., Fan, H. J. & Grätzel, M. (2014) Water photolysis at 12.3% efficiency via perovskite photovoltaics and Earth-abundant catalysts. *Science*, 345(6204), 1593-1596.
- Wang, F., Fang, B., Yu, X. & Feng, L. (2019) Coupling Ultrafine Pt Nanocrystals over the Fe $_2$ P Surface as a Robust Catalyst for Alcohol Fuel Electro-Oxidation. *ACS Applied Materials & Interfaces*, 11(9), 9496-9503.
